# Supplementary material for: Assessment of permethylated transition-metal sandwich complexes as internal reference redox systems in ionic liquids
Source: Royal Society of Chemistry journal article supplement (doi:10.1039/c2cp43177g), 2013-01-01
Supplement: c2cp43177g.pdf [file c2cp43177g.pdf]

# Supporting Information

## Assessment of permethylated transition-metal sandwich complexes as internal reference redox systems in ionic liquids

*Angel A. J. Torriero\**, Jaka Sunarso, Maria Forsyth, Cristina Pozo-Gonzalo,

*Australian Research Council (ARC) Centre of Excellence for Electromaterials Science, Institute for Frontier Materials, Deakin University, Burwood, Victoria 3125, Australia. Fax: +61(3)92446868.*

Phone: +61(3)92446897.

E-mail: [angel.torriero@deakin.edu.au](mailto:angel.torriero@deakin.edu.au)

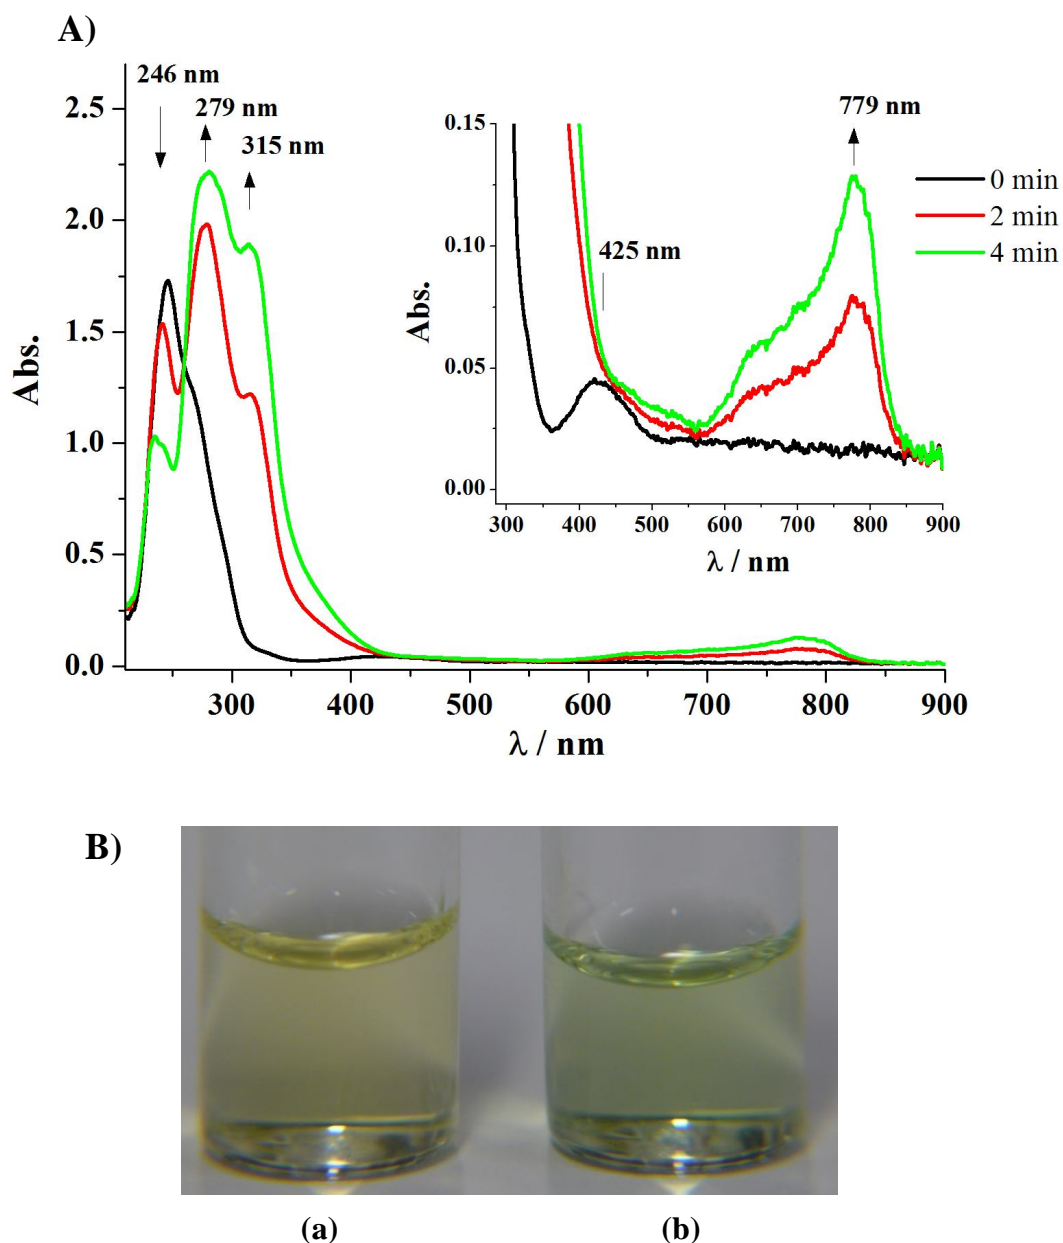

**Figure S1.** **A)** UV-visible spectra obtained from 1.15 mM DmFc solution in acetonitrile (0.1 M  $[\text{Bu}_4\text{N}][\text{PF}_6]$ ) during the course of oxidative electrolysis at 0.2 V vs.  $\text{DmFc}^{0/+}$ . This experiment was performed with platinum gauze working electrode, a Pt wire auxiliary electrode separated from the Pt gauze by a fine porosity frit, and an  $\text{Ag}/\text{Ag}^+$  (0.01 M  $\text{AgNO}_3$ , 0.1 M  $[\text{Bu}_4\text{N}][\text{PF}_6]$ ) double junction reference electrode. A rectangular quartz cuvette (2.0 mm optical path length) was used as the electrochemical cell. Inset: amplification of A to show the DmFc spectra before bulk electrolysis. **B)** Comparison of a 1.15 mM DmFc solution in acetonitrile (0.1 M  $[\text{Bu}_4\text{N}][\text{PF}_6]$ ) before (a) and after (b) oxidative electrolysis.

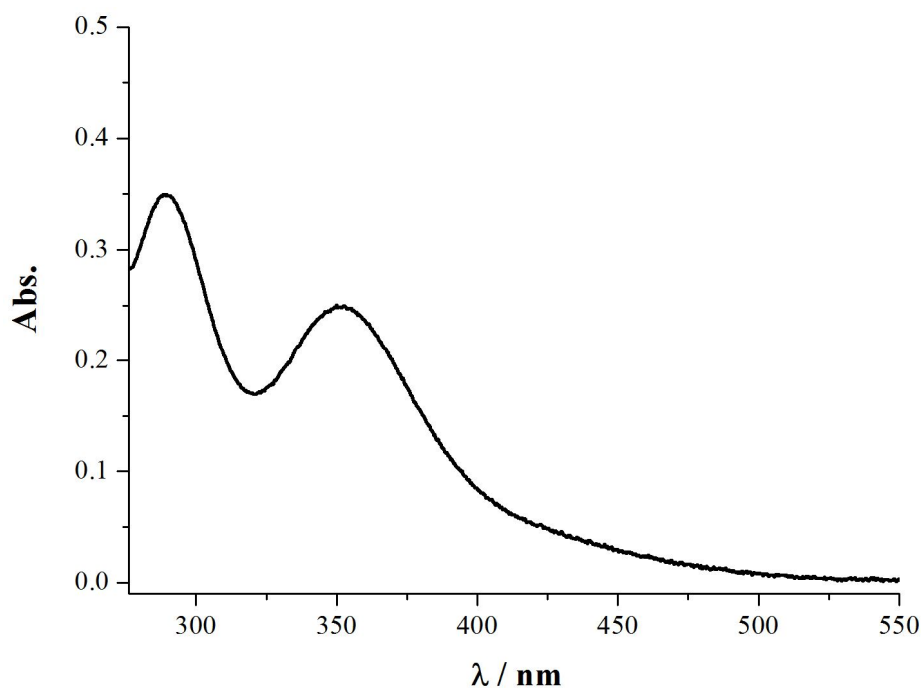

**Figure S2.** UV-visible spectra of triiodide formed in 2 mL of an aqueous phase after liquid-liquid extraction with 0.4 mL of [C<sub>4</sub>mim][NTf<sub>2</sub>] and addition of 0.20 mmol potassium iodide. The IL phase, containing 2.27 mmol/Kg DmFc, was stirred in oxygen- and water-saturated atmosphere during two hours before contact with the aqueous phase. The spectrum was obtained with a 1 cm cuvette at 20 ± 1 °C.

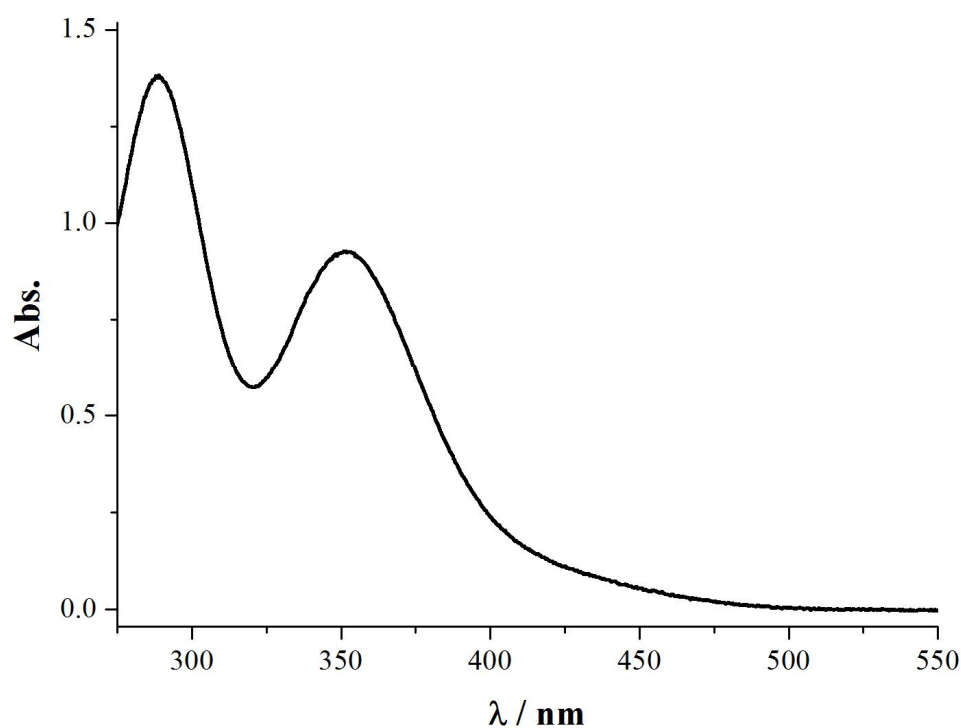

**Figure S3.** UV-visible spectra of triiodide formed in 2 mL of the aqueous phase after liquid-liquid extraction with 0.4 mL of [C<sub>4</sub>mpyr][NTf<sub>2</sub>] and addition of 0.2 mmol potassium iodide. The IL phase, containing 2.19 mmol/Kg DmFc and 26.07 mmol HNTf<sub>2</sub>, was stirred in oxygen- and water-saturated atmosphere during two hours before contact with the aqueous phase. The spectrum was obtained with a 1 cm cuvette at 20 ± 1 °C.
